# Supplementary material for: Determinants of uncontrolled blood pressure among adult hypertensive patients on follow-up at Negelle and Adola General Hospital, Guji Zone, Southern Ethiopia: facility-based case control study
Source: PubMed Central journal article supplement — BMC Public Health. 2024 Oct 26;24:2971. doi: 10.1186/s12889-024-20366-3 (PMC11515201; doi:10.1186/s12889-024-20366-3), 2024-10-26
Supplement: 12889_2024_20366_MOESM3_ESM.pdf [file 12889_2024_20366_MOESM3_ESM.pdf]

### Annex III. English Version Questionnaire

A questionnaire designed to identify Determinants of uncontrolled blood pressure among adult hypertensive patients on follow-up at Negelle and Adola hospitals, southern Ethiopia, 2023.

| <b>General information</b>                                       |                                           |                                                                                                         |
|------------------------------------------------------------------|-------------------------------------------|---------------------------------------------------------------------------------------------------------|
| <b>Code No</b>                                                   |                                           |                                                                                                         |
| <b>Name of the facility</b>                                      | <b>1. NGH                      2. AGH</b> |                                                                                                         |
| <b>Name of The Data Collector</b>                                |                                           |                                                                                                         |
| <b>Date of Data collection</b>                                   |                                           |                                                                                                         |
| <b>Starting time</b>                                             |                                           |                                                                                                         |
| <b>Finishing time</b>                                            |                                           |                                                                                                         |
| <b>Part I. Socio-demographic Characteristics of the patients</b> |                                           |                                                                                                         |
| <b>No</b>                                                        | <b>Question</b>                           | <b>Responses</b>                                                                                        |
| <b>101</b>                                                       | How old are you?                          | _____ Years                                                                                             |
| <b>102</b>                                                       | Sex                                       | Male    2. Female                                                                                       |
| <b>103</b>                                                       | What is your marital status?              | 1. Married    2. Separated<br>3. Divorce    4. Widowed<br>5. Single                                     |
| <b>104</b>                                                       | What is your Religion?                    | 1. Orthodox    2. Muslim<br>3. Protestant    4. Catholic<br>5. Other _____                              |
| <b>105</b>                                                       | What is your educational level?           | 1. No formal education<br>2. Primary School(1-8)<br>3. Secondary school (9-12)<br>4. Collage/university |
| <b>106</b>                                                       | What is your Occupation?                  | 1. Housewife<br>2. Government employer<br>3. Un-employed<br>4. retired<br>5. merchant                   |

|                                                                               |                                                                                  |                                                                             |          |          |          |          |          |          |          |
|-------------------------------------------------------------------------------|----------------------------------------------------------------------------------|-----------------------------------------------------------------------------|----------|----------|----------|----------|----------|----------|----------|
|                                                                               |                                                                                  | 6. Farmer<br>7. Daily laborer<br>8. Student<br>9. Other(s) [Specify]: _____ |          |          |          |          |          |          |          |
| <b>107</b>                                                                    | How much is your estimated family income level in Birr?                          | _____                                                                       |          |          |          |          |          |          |          |
| <b>108</b>                                                                    | Where are you Residence?                                                         | 1. Urban      2.Rural                                                       |          |          |          |          |          |          |          |
| <b>Part II. Hypertension—Self-care Activity Level Effects (H-SCALE) Items</b> |                                                                                  |                                                                             |          |          |          |          |          |          |          |
| <b>201</b>                                                                    | <b>Medication Adherence:</b>                                                     | <b>0</b>                                                                    | <b>1</b> | <b>2</b> | <b>3</b> | <b>4</b> | <b>5</b> | <b>6</b> | <b>7</b> |
|                                                                               | How many of the past 7 days did you:                                             |                                                                             |          |          |          |          |          |          |          |
|                                                                               | Take your blood pressure pills?                                                  |                                                                             |          |          |          |          |          |          |          |
|                                                                               | Take your blood pressure pills at the same time every day?                       |                                                                             |          |          |          |          |          |          |          |
|                                                                               | Take the recommended number of blood pressure pills.                             |                                                                             |          |          |          |          |          |          |          |
| <b>202</b>                                                                    | <b>Low-salt diet:</b> How many of the past 7 days did you...                     | <b>0</b>                                                                    | <b>1</b> | <b>2</b> | <b>3</b> | <b>4</b> | <b>5</b> | <b>6</b> | <b>7</b> |
|                                                                               | Follow a healthy eating plan (Frequent eating of vegetables, low saturated fat)? |                                                                             |          |          |          |          |          |          |          |
|                                                                               | Ate 5 fruits and vegetables a day?                                               |                                                                             |          |          |          |          |          |          |          |
|                                                                               | Ate packaged bakery goods?                                                       |                                                                             |          |          |          |          |          |          |          |
|                                                                               | Ate potato chips, potato or bread?                                               |                                                                             |          |          |          |          |          |          |          |
|                                                                               | Ate fried foods such as chicken, roasted Meat, or fish?                          |                                                                             |          |          |          |          |          |          |          |
|                                                                               | Avoid eating fatty foods and salt items.                                         |                                                                             |          |          |          |          |          |          |          |
|                                                                               | Salt your food at the table?                                                     |                                                                             |          |          |          |          |          |          |          |
|                                                                               | Added salt when cooking                                                          |                                                                             |          |          |          |          |          |          |          |
|                                                                               | Ate pizza?                                                                       |                                                                             |          |          |          |          |          |          |          |
|                                                                               | Ate processed meats?                                                             |                                                                             |          |          |          |          |          |          |          |
|                                                                               | Eat smoked dry beef?                                                             |                                                                             |          |          |          |          |          |          |          |
|                                                                               | Ate pickles, or other vegetables in brine?                                       |                                                                             |          |          |          |          |          |          |          |
| <b>203</b>                                                                    | <b>Physical Activity:</b> How many of the past 7 days did you                    | <b>0</b>                                                                    | <b>1</b> | <b>2</b> | <b>3</b> | <b>4</b> | <b>5</b> | <b>6</b> | <b>7</b> |
|                                                                               | Do at least 30 minutes total of physical activity?                               |                                                                             |          |          |          |          |          |          |          |

|                                                                                                         |                                                                                                                                                                                                                |                          |                 |                     |              |          |          |                       |          |
|---------------------------------------------------------------------------------------------------------|----------------------------------------------------------------------------------------------------------------------------------------------------------------------------------------------------------------|--------------------------|-----------------|---------------------|--------------|----------|----------|-----------------------|----------|
|                                                                                                         | Do a specific exercise activity (such as swimming, walking, or biking) other than what you do around the house or as part of your work?                                                                        |                          |                 |                     |              |          |          |                       |          |
| <b>204</b>                                                                                              | <b>Cigarette smoking:</b> How many of the past 7 days did you                                                                                                                                                  | <b>0</b>                 | <b>1</b>        | <b>2</b>            | <b>3</b>     | <b>4</b> | <b>5</b> | <b>6</b>              | <b>7</b> |
|                                                                                                         | Smoke a cigarette or cigar, even just one puff?                                                                                                                                                                |                          |                 |                     |              |          |          |                       |          |
| <b>113</b>                                                                                              | <b>Alcohol:</b> A drink of alcohol is defined as one 354.89 ml can or bottle of beer, one 118.29 ml glass of wine, 354.89ml can or bottle of wine cooler, 1 mixed drink or cocktail, or 1 shot of hard liquor. | <b>0</b>                 | <b>1</b>        | <b>2</b>            | <b>3</b>     | <b>4</b> | <b>5</b> | <b>6</b>              | <b>7</b> |
|                                                                                                         | On average, how many days per week do you drink alcohol?                                                                                                                                                       |                          |                 |                     |              |          |          |                       |          |
| <b>114</b>                                                                                              | <b>Weight Management:</b> to lose weight or maintain my weight...                                                                                                                                              | <b>Strongly Disagree</b> | <b>disagree</b> | <b>Neutral</b>      | <b>Agree</b> |          |          | <b>Strongly agree</b> |          |
|                                                                                                         | I am careful about what I eat.                                                                                                                                                                                 |                          |                 |                     |              |          |          |                       |          |
|                                                                                                         | I read food labels when I grocery shop.                                                                                                                                                                        |                          |                 |                     |              |          |          |                       |          |
|                                                                                                         | I exercise to lose or maintain weight.                                                                                                                                                                         |                          |                 |                     |              |          |          |                       |          |
|                                                                                                         | I have cut out drinking sugary sodas and sweet tea.                                                                                                                                                            |                          |                 |                     |              |          |          |                       |          |
|                                                                                                         | I eat smaller portions or eat fewer portions.                                                                                                                                                                  |                          |                 |                     |              |          |          |                       |          |
|                                                                                                         | I have stopped buying or bringing unhealthy foods into my home.                                                                                                                                                |                          |                 |                     |              |          |          |                       |          |
|                                                                                                         | I have cut out of limit some foods that I like but that is not good for me.                                                                                                                                    |                          |                 |                     |              |          |          |                       |          |
|                                                                                                         | I eat at restaurants or fast food places less often.                                                                                                                                                           |                          |                 |                     |              |          |          |                       |          |
|                                                                                                         | I substitute healthier foods for things that I used to eat.                                                                                                                                                    |                          |                 |                     |              |          |          |                       |          |
|                                                                                                         | I have modified my recipes when I cook                                                                                                                                                                         |                          |                 |                     |              |          |          |                       |          |
| <b>Part III. hypertension knowledge of the respondents: Hypertension Knowledge-Level Scale (HK-LS*)</b> |                                                                                                                                                                                                                |                          |                 |                     |              |          |          |                       |          |
|                                                                                                         | <b>Hypertension Knowledge-Level Scale (HK-LS</b>                                                                                                                                                               | <b>Yes</b>               | <b>No</b>       | <b>I don't know</b> |              |          |          |                       |          |
|                                                                                                         | <b>Definition</b>                                                                                                                                                                                              | <b>1</b>                 | <b>0</b>        | <b>2</b>            |              |          |          |                       |          |

|     |                                                                                                                       |  |  |  |
|-----|-----------------------------------------------------------------------------------------------------------------------|--|--|--|
| 301 | Increased diastolic blood pressure also indicates increased blood pressure.                                           |  |  |  |
| 302 | High diastolic or systolic blood pressure indicates increased blood pressure.                                         |  |  |  |
|     | <b>Medical Treatment</b>                                                                                              |  |  |  |
| 303 | Drugs for increased blood pressure must be taken every day.                                                           |  |  |  |
| 304 | Individuals with increased blood pressure must not take their medication only when they feel ill.                     |  |  |  |
| 305 | Individuals with increased blood pressure must take their medication throughout their life                            |  |  |  |
| 306 | Individuals with increased blood pressure should not take their medication in a manner that makes them feel good.     |  |  |  |
|     | <b>Drug Compliance</b>                                                                                                |  |  |  |
| 307 | Even if the medication for increased blood pressure can control blood pressure, there is a need to change lifestyles. |  |  |  |
| 308 | Increased blood pressure is the result of aging, so treatment is unnecessary.                                         |  |  |  |
| 309 | Even if individuals with increased blood pressure change their lifestyles, there is a need for treatment.             |  |  |  |
| 310 | Individuals with increased blood pressure can eat salty foods as long as they take their drugs regularly.             |  |  |  |
|     | <b>Lifestyle</b>                                                                                                      |  |  |  |
| 311 | Individuals with increased blood pressure shouldn't drink alcoholic beverages.                                        |  |  |  |
| 312 | Individuals with increased blood pressure must not smoke.                                                             |  |  |  |
| 313 | Individuals with increased blood pressure must eat fruits and vegetables frequently.                                  |  |  |  |
| 314 | For individuals with increased blood pressure, the best the cooking method is frying.                                 |  |  |  |

|                                                                 |                                                                                                |                                                                                                                                              |  |  |
|-----------------------------------------------------------------|------------------------------------------------------------------------------------------------|----------------------------------------------------------------------------------------------------------------------------------------------|--|--|
| <b>315</b>                                                      | For individuals with increased blood pressure, the best cooking method is boiling or grilling. |                                                                                                                                              |  |  |
|                                                                 | <b>Diet</b>                                                                                    |                                                                                                                                              |  |  |
| <b>316</b>                                                      | The best type of meat for individuals with increased blood pressure is white meat.             |                                                                                                                                              |  |  |
| <b>317</b>                                                      | The best type of meat for individuals with increased blood pressure is red meat                |                                                                                                                                              |  |  |
|                                                                 | <b>Complications</b>                                                                           |                                                                                                                                              |  |  |
| <b>318</b>                                                      | Increased blood pressure can cause premature death if left untreated.                          |                                                                                                                                              |  |  |
| <b>319</b>                                                      | Increased blood pressure can cause heart diseases, such as heart attack, if left untreated.    |                                                                                                                                              |  |  |
| <b>320</b>                                                      | Increased blood pressure can cause strokes if left untreated.                                  |                                                                                                                                              |  |  |
| <b>321</b>                                                      | Increased blood pressure can cause kidney failure if left untreated.                           |                                                                                                                                              |  |  |
| <b>322</b>                                                      | Increased blood pressure can cause visual disturbances if left untreated                       |                                                                                                                                              |  |  |
| <b>Part IV. Clinical and medication-related questionnaires.</b> |                                                                                                |                                                                                                                                              |  |  |
| <b>401</b>                                                      | Do you have a Family History of hypertension                                                   | 1. Yes, 2. No                                                                                                                                |  |  |
| <b>402</b>                                                      | How long has it been since you were diagnosed with hypertension?                               | _____                                                                                                                                        |  |  |
| <b>403</b>                                                      | What is your frequency of follow-up at the hospital?                                           | 1. Weekly<br>2. Every two weeks<br>3. Monthly<br>4. Every two months<br>5. Every three months<br>6. Every six Months<br>7. Other specify____ |  |  |
| <b>404</b>                                                      | How do you get your medications?                                                               | 1. Health insurance                                                                                                                          |  |  |

|     |                                                                                                    |                                                                                                                               |
|-----|----------------------------------------------------------------------------------------------------|-------------------------------------------------------------------------------------------------------------------------------|
|     |                                                                                                    | 2. Free of charge<br>3. self-sponsored                                                                                        |
| 405 | Did you miss the appointments?                                                                     | Yes, 2. No                                                                                                                    |
| 406 | How often do you Measure your Blood pressure?                                                      | 1. Weekly<br>2. Every two weeks<br>3. Every two Month<br>4. Every three month<br>5. Every six Month<br>6. Other specify_<br>— |
| 407 | Do you currently use traditional medicine along with or in place of modern antihypertensive drugs? | 1. Yes, 2. No                                                                                                                 |

**Part V. Psychosocial-related questionnaire factors:**

**Anxiety: The generalized anxiety disorder 7-item (GAD-7) scale**

| Have ever been bothered by any of the following problems in the last two weeks? |                                                    | 0          | 1       | 2                    | 3                |
|---------------------------------------------------------------------------------|----------------------------------------------------|------------|---------|----------------------|------------------|
|                                                                                 |                                                    | Not at all | Several | More than Half a day | Nearly Every Day |
| 501                                                                             | Feeling nervous, anxious, or on edge?              |            |         |                      |                  |
| 502                                                                             | Not being able to stop or control worrying?        |            |         |                      |                  |
| 503                                                                             | Worrying too much about different things?          |            |         |                      |                  |
| 504                                                                             | Trouble relaxing?                                  |            |         |                      |                  |
| 505                                                                             | Being so restless that it is hard to sit still?    |            |         |                      |                  |
| 506                                                                             | Becoming easily annoyed or irritable?              |            |         |                      |                  |
| 507                                                                             | Feeling afraid as if something awful might happen? |            |         |                      |                  |

**Depression: Patient Health Questionnaire-9 (PHQ-9) scale**

| Have ever been bothered by any of the following problems in the last two weeks? |                                             | 0 | 1 | 2 | 3 |
|---------------------------------------------------------------------------------|---------------------------------------------|---|---|---|---|
| 508                                                                             | Little interest or pleasure in doing things |   |   |   |   |

|     |                                                                                       |  |  |  |  |
|-----|---------------------------------------------------------------------------------------|--|--|--|--|
| 509 | Feeling down, depressed, or hopeless                                                  |  |  |  |  |
| 510 | Trouble feeling or staying asleep, or sleeping too much                               |  |  |  |  |
| 511 | Feeling tired or having little energy                                                 |  |  |  |  |
| 512 | Poor appetite or overeating                                                           |  |  |  |  |
| 513 | Feeling bad about yourself or that you are a failure                                  |  |  |  |  |
| 514 | Trouble concentrating on things, such as reading the newspaper or watching television |  |  |  |  |
| 515 | Moving or speaking so slowly that other people could have noticed.                    |  |  |  |  |
| 516 | Thoughts that you would be better off dead, or hurting yourself                       |  |  |  |  |

**Social support: Standardization of the Oslo Social Support Scale (OSSS-3)**

|     |                                                                                                     |                                                              |
|-----|-----------------------------------------------------------------------------------------------------|--------------------------------------------------------------|
| 517 | How many people are so close to you that you can count on them if you have great personal problems? | 1. None<br>2. 1-2<br>3. 3-5<br>4. 5+                         |
| 518 | How much interest and concern do people show in what you do?                                        | 1. None<br>2. little<br>3. Uncertain<br>4. Some<br>5. A lot  |
| 519 | How easy is it to get practical help from neighbors if you should need it?                          | Very difficult<br>Difficult<br>Possible<br>Easy<br>very easy |

**Part VI: Client's chart reviewed**

|     |               |             |                 |
|-----|---------------|-------------|-----------------|
| 601 | <b>Visits</b> | <b>date</b> | <b>BP(mmHg)</b> |
|     |               |             |                 |
|     |               |             |                 |

|     |                                    |                                                                                                                                                                                                                                             |
|-----|------------------------------------|---------------------------------------------------------------------------------------------------------------------------------------------------------------------------------------------------------------------------------------------|
|     |                                    |                                                                                                                                                                                                                                             |
| 602 | <b>Comorbid Conditions</b>         | <ol style="list-style-type: none"> <li>1. Diabetes</li> <li>2. Chronic Kidney disease</li> <li>3. Myocardial infarction</li> <li>4. Stroke</li> <li>5. Heart failure</li> <li>6. Hyperlipidemia</li> <li>7. Other (Specify)_____</li> </ol> |
| 603 | <b>Anthropometric Measurements</b> | Current Weight_____Kg<br>Height_____m<br>BMI_____Kg/m <sup>2</sup>                                                                                                                                                                          |
